# Supplementary material for: Changes in Heart Rate, Heart Rate Variability, Breathing Rate, and Skin Temperature throughout Pregnancy and the Impact of Emotions—A Longitudinal Evaluation Using a Sensor Bracelet
Source: MDPI journal article supplement (doi:10.3390/s23146620), 2023-07-23

## Breathing rate (breaths per minute)

### Model 1: anxiety

|                               |                      |
|-------------------------------|----------------------|
| Gestational age (weeks)       | -0.15 [-0.23, -0.07] |
| Anxious (sometimes to always) | -0.11 [-0.21, -0.02] |

### Model 2: stress

|                                       |                      |
|---------------------------------------|----------------------|
| Gestational age (weeks)               | -0.15 [-0.24, -0.07] |
| Stressed (most of the time to always) | -0.08 [-0.22, 0.06]  |
| Gestational age * stressed            |                      |

### Model 3: tiredness

|                                    |                      |
|------------------------------------|----------------------|
| Gestational age (weeks)            | -0.17 [-0.25, -0.08] |
| Tired (most of the time to always) | -0.3 [-0.62, 0.07]   |
| Gestational age * tired            | 0.01 [0, 0.03]       |

### Model 4: sensitivity

|                                        |                      |
|----------------------------------------|----------------------|
| Gestational age (weeks)                | -0.18 [-0.28, -0.1]  |
| Sensitive (most of the time to always) | -0.68 [-1.23, -0.08] |
| Gestational age * sensitive            | 0.03 [0, 0.06]       |

### Model 5: unmotivated

|                                          |                      |
|------------------------------------------|----------------------|
| Gestational age (weeks)                  | -0.14 [-0.17, -0.11] |
| Unmotivated (most of the time to always) | -0.13 [-0.31, 0.05]  |

### Model 6: calm

|                           |                      |
|---------------------------|----------------------|
| Gestational age (weeks)   | -0.15 [-0.23, -0.07] |
| Calm (sometimes to never) | 0.09 [-0.23, 0.49]   |
| Gestational age * calm    | -0.01 [-0.03, 0.01]  |

### Model 7: energized

|                                |                      |
|--------------------------------|----------------------|
| Gestational age (weeks)        | -0.19 [-0.27, -0.12] |
| Energized (sometimes to never) | -0.43 [-0.83, 0.05]  |
| Gestational age * energized    | 0.04 [0.01, 0.06]    |

### Model 8: happiness

|                            |                      |
|----------------------------|----------------------|
| Gestational age (weeks)    | -0.14 [-0.23, -0.06] |
| Happy (sometimes to never) | 0.34 [0.1, 0.59]     |
| Gestational age * happy    | -0.02 [-0.03, 0]     |

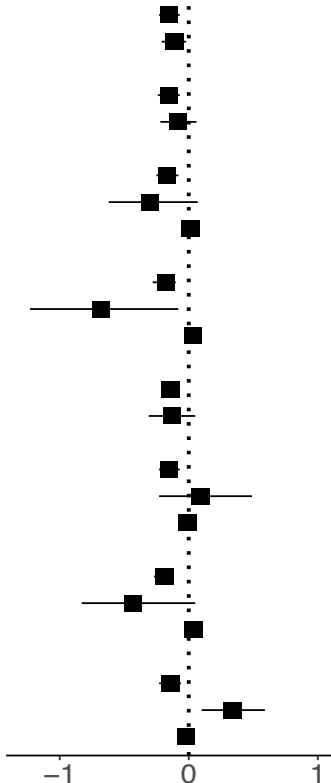

Supplement: s1 [file s1]
