# Supplementary material for: Changes in Heart Rate, Heart Rate Variability, Breathing Rate, and Skin Temperature throughout Pregnancy and the Impact of Emotions—A Longitudinal Evaluation Using a Sensor Bracelet
Source: MDPI journal article supplement (doi:10.3390/s23146620), 2023-07-23

## Heart rate (beats per minute)

### Model 1: anxiety

|                               |                     |
|-------------------------------|---------------------|
| Gestational age (weeks)       | 1.46 [0.77, 1.98]   |
| Anxious (sometimes to always) | -0.44 [-0.88, 0.02] |

### Model 2: stress

|                                       |                      |
|---------------------------------------|----------------------|
| Gestational age (weeks)               | 1.42 [0.79, 1.9]     |
| Stressed (most of the time to always) | -3.01 [-4.48, -1.55] |
| Gestational age * stressed            | 0.13 [0.06, 0.19]    |

### Model 3: tiredness

|                                    |                    |
|------------------------------------|--------------------|
| Gestational age (weeks)            | 1.44 [0.73, 1.96]  |
| Tired (most of the time to always) | -0.22 [-0.77, 0.5] |

### Model 4: sensitivity

|                                        |                    |
|----------------------------------------|--------------------|
| Gestational age (weeks)                | 1.31 [0.63, 1.81]  |
| Sensitive (most of the time to always) | -1.2 [-1.99, -0.4] |

### Model 5: unmotivated

|                                          |                     |
|------------------------------------------|---------------------|
| Gestational age (weeks)                  | 1.42 [0.75, 1.9]    |
| Unmotivated (most of the time to always) | -0.12 [-0.89, 0.74] |

### Model 6: calm

|                           |                     |
|---------------------------|---------------------|
| Gestational age (weeks)   | 1.44 [0.76, 1.94]   |
| Calm (sometimes to never) | -2.54 [-4.2, -0.89] |
| Gestational age * calm    | 0.1 [0.03, 0.18]    |

### Model 7: energized

|                                |                      |
|--------------------------------|----------------------|
| Gestational age (weeks)        | 2.21 [1.36, 2.9]     |
| Energized (sometimes to never) | -3.65 [-5.92, -0.89] |
| Gestational age * energized    | 0.25 [0.07, 0.38]    |

### Model 8: happiness

|                            |                     |
|----------------------------|---------------------|
| Gestational age (weeks)    | 1.42 [0.76, 1.91]   |
| Happy (sometimes to never) | -0.23 [-0.76, 0.31] |

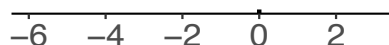

Supplement: s1 [file s1]
