# Supplementary material for: Changes in Heart Rate, Heart Rate Variability, Breathing Rate, and Skin Temperature throughout Pregnancy and the Impact of Emotions—A Longitudinal Evaluation Using a Sensor Bracelet
Source: MDPI journal article supplement (doi:10.3390/s23146620), 2023-07-23

# Heart rate variability

## Model 1: anxiety

|                               |                      |
|-------------------------------|----------------------|
| Gestational age (weeks)       | -3.25 [-4.27, -2.31] |
| Anxious (sometimes to always) | -0.34 [-1.2, 0.52]   |

## Model 2: stress

|                                       |                      |
|---------------------------------------|----------------------|
| Gestational age (weeks)               | -3.29 [-4.3, -2.39]  |
| Stressed (most of the time to always) | 6.26 [3.78, 8.64]    |
| Gestational age * stressed            | -0.33 [-0.41, -0.23] |

## Model 3: tiredness

|                                    |                      |
|------------------------------------|----------------------|
| Gestational age (weeks)            | -3.1 [-4.05, -2.23]  |
| Tired (most of the time to always) | -1.09 [-2.05, -0.05] |

## Model 4: sensitivity

|                                        |                      |
|----------------------------------------|----------------------|
| Gestational age (weeks)                | -3.37 [-4.34, -2.47] |
| Sensitive (most of the time to always) | -4.6 [-8.05, -1.45]  |
| Gestational age * sensitive            | 0.29 [0.12, 0.47]    |

## Model 5: unmotivated

|                                          |                      |
|------------------------------------------|----------------------|
| Gestational age (weeks)                  | -3.18 [-4.19, -2.28] |
| Unmotivated (most of the time to always) | -1.08 [-2.64, 0.6]   |

## Model 6: calm

|                           |                      |
|---------------------------|----------------------|
| Gestational age (weeks)   | -3.29 [-4.32, -2.39] |
| Calm (sometimes to never) | 2.43 [-0.64, 5.45]   |
| Gestational age * calm    | -0.16 [-0.29, -0.02] |

## Model 7: energized

|                                |                      |
|--------------------------------|----------------------|
| Gestational age (weeks)        | -4.09 [-5.28, -2.84] |
| Energized (sometimes to never) | -0.69 [-2.4, 0.94]   |

## Model 8: happiness

|                            |                     |
|----------------------------|---------------------|
| Gestational age (weeks)    | -3.04 [-4.11, -2.1] |
| Happy (sometimes to never) | 3.61 [1.01, 5.92]   |
| Gestational age * happy    | -0.2 [-0.3, -0.09]  |

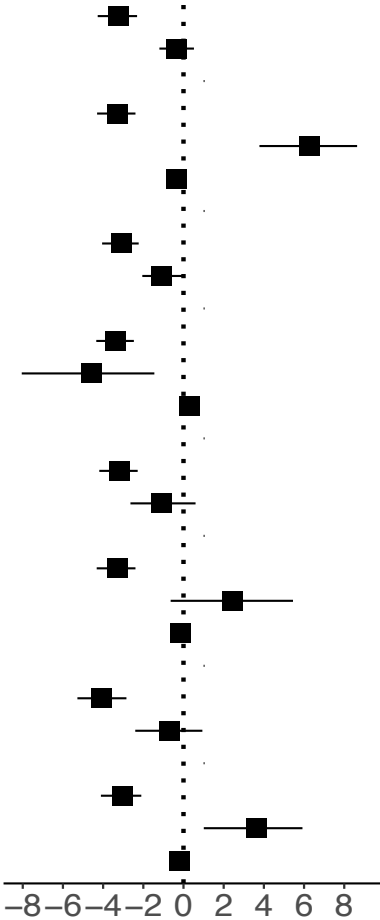

Supplement: s1 [file s1]
