# Supplementary material for: Changes in Heart Rate, Heart Rate Variability, Breathing Rate, and Skin Temperature throughout Pregnancy and the Impact of Emotions—A Longitudinal Evaluation Using a Sensor Bracelet
Source: MDPI journal article supplement (doi:10.3390/s23146620), 2023-07-23
Supplement: s1 [file s1]

Supp Table S1: Mean weekly measurements of the four basic physiological parameters during pregnancy.

| Gestational Week | Wrist Skin Temperature |      | Breathing Rate |      | Heart Rate |       | Heart Rate Variability |       |
|------------------|------------------------|------|----------------|------|------------|-------|------------------------|-------|
|                  | Mean                   | SD   | Mean           | SD   | Mean       | SD    | Mean                   | SD    |
| 8                | 35,40                  | 0,60 | 14,55          | 0,12 | 61,47      | 1,41  | 67,95                  | 5,08  |
| 9                | 36,01                  | 0,43 | 13,44          | 1,49 | 64,83      | 2,61  | 60,97                  | 2,98  |
| 10               | 36,54                  | 0,33 | 12,34          | 0,15 | 65,63      | 2,06  | 60,54                  | 4,69  |
| 11               | 36,50                  | 0,27 | 15,27          | 3,34 | 64,71      | 2,48  | 55,19                  | 5,32  |
| 12               | 36,33                  | 0,26 | 15,74          | 3,17 | 67,42      | 3,11  | 48,17                  | 4,80  |
| 13               | 36,08                  | 0,45 | 16,21          | 2,99 | 62,60      | 5,30  | 62,01                  | 18,96 |
| 14               | 36,02                  | 0,48 | 16,25          | 2,82 | 62,23      | 6,06  | 63,32                  | 19,12 |
| 15               | 35,96                  | 0,44 | 16,15          | 3,11 | 62,89      | 6,21  | 58,65                  | 14,68 |
| 16               | 35,94                  | 0,54 | 16,06          | 2,87 | 64,04      | 7,85  | 55,80                  | 13,05 |
| 17               | 35,98                  | 0,43 | 16,18          | 2,46 | 65,66      | 9,24  | 53,77                  | 11,67 |
| 18               | 35,95                  | 0,49 | 15,77          | 2,46 | 66,13      | 9,69  | 50,86                  | 11,84 |
| 19               | 35,94                  | 0,43 | 15,96          | 2,24 | 65,86      | 9,83  | 51,41                  | 11,43 |
| 20               | 35,89                  | 0,43 | 15,88          | 2,48 | 65,48      | 9,05  | 52,52                  | 10,78 |
| 21               | 35,85                  | 0,50 | 15,80          | 1,96 | 64,34      | 8,56  | 53,59                  | 10,23 |
| 22               | 35,68                  | 0,61 | 16,13          | 2,14 | 63,95      | 10,24 | 50,85                  | 10,35 |
| 23               | 35,76                  | 0,52 | 15,67          | 2,07 | 65,16      | 10,18 | 52,06                  | 11,35 |
| 24               | 35,71                  | 0,49 | 16,05          | 2,14 | 65,68      | 10,16 | 52,01                  | 12,57 |
| 25               | 35,79                  | 0,44 | 15,42          | 1,77 | 66,57      | 8,29  | 51,29                  | 19,15 |
| 26               | 35,66                  | 0,53 | 15,22          | 1,74 | 65,74      | 9,39  | 49,66                  | 8,82  |
| 27               | 35,73                  | 0,52 | 15,17          | 1,95 | 65,80      | 10,06 | 50,30                  | 9,61  |
| 28               | 35,67                  | 0,55 | 15,25          | 2,11 | 65,74      | 9,80  | 48,98                  | 9,43  |
| 29               | 35,62                  | 0,49 | 15,29          | 2,26 | 66,75      | 10,15 | 51,42                  | 11,30 |
| 30               | 35,69                  | 0,47 | 14,93          | 2,38 | 64,06      | 9,70  | 50,44                  | 11,61 |
| 31               | 35,60                  | 0,48 | 15,08          | 2,23 | 64,73      | 10,38 | 50,57                  | 9,20  |
| 32               | 35,53                  | 0,46 | 14,98          | 1,93 | 64,39      | 9,86  | 50,83                  | 10,00 |
| 33               | 35,59                  | 0,42 | 15,30          | 2,26 | 66,03      | 9,54  | 51,00                  | 11,44 |
| 34               | 35,47                  | 0,60 | 15,53          | 2,31 | 66,83      | 12,06 | 50,89                  | 11,35 |
| 35               | 35,35                  | 0,67 | 14,99          | 2,22 | 67,12      | 10,57 | 51,45                  | 10,33 |
| 36               | 35,30                  | 0,88 | 14,48          | 2,14 | 63,23      | 13,70 | 54,11                  | 10,23 |
| 37               | 35,23                  | 0,92 | 14,87          | 2,16 | 63,81      | 10,67 | 56,64                  | 11,41 |
| 38               | 35,42                  | 0,58 | 14,85          | 2,05 | 62,81      | 10,04 | 59,36                  | 10,51 |
| 39               | 35,67                  | 0,84 | 13,56          | 0,99 | 64,13      | 4,06  | 57,55                  | 13,95 |
| 40               | 35,57                  | 0,54 | 14,48          | 0,15 | 63,49      | 0,66  | 57,31                  | 3,90  |
