# Supplementary material for: Changes in Heart Rate, Heart Rate Variability, Breathing Rate, and Skin Temperature throughout Pregnancy and the Impact of Emotions—A Longitudinal Evaluation Using a Sensor Bracelet
Source: MDPI journal article supplement (doi:10.3390/s23146620), 2023-07-23

# Wrist skin temperature °C

## Model 1: anxiety

|                               |                      |
|-------------------------------|----------------------|
| Gestational age (weeks)       | -0.03 [-0.03, -0.02] |
| Anxious (sometimes to always) | -0.15 [-0.22, -0.07] |

## Model 2: stress

|                                       |                      |
|---------------------------------------|----------------------|
| Gestational age (weeks)               | -0.02 [-0.03, -0.01] |
| Stressed (most of the time to always) | 0.01 [-0.08, 0.09]   |

## Model 3: tiredness

|                                    |                      |
|------------------------------------|----------------------|
| Gestational age (weeks)            | -0.02 [-0.03, -0.01] |
| Tired (most of the time to always) | 0.11 [0.03, 0.19]    |

## Model 4: sensitivity

|                                        |                      |
|----------------------------------------|----------------------|
| Gestational age (weeks)                | -0.02 [-0.03, -0.01] |
| Sensitive (most of the time to always) | 0 [-0.13, 0.13]      |

## Model 5: unmotivated

|                                          |                      |
|------------------------------------------|----------------------|
| Gestational age (weeks)                  | -0.02 [-0.03, -0.01] |
| Unmotivated (most of the time to always) | -0.06 [-0.15, 0.03]  |

## Model 6: calm

|                           |                      |
|---------------------------|----------------------|
| Gestational age (weeks)   | -0.02 [-0.03, -0.01] |
| Calm (sometimes to never) | -0.02 [-0.12, 0.08]  |

## Model 7: energized

|                                |                      |
|--------------------------------|----------------------|
| Gestational age (weeks)        | -0.02 [-0.04, -0.01] |
| Energized (sometimes to never) | -0.05 [-0.23, 0.1]   |

## Model 8: happiness

|                            |                      |
|----------------------------|----------------------|
| Gestational age (weeks)    | -0.02 [-0.03, -0.02] |
| Happy (sometimes to never) | 0.06 [-0.03, 0.14]   |

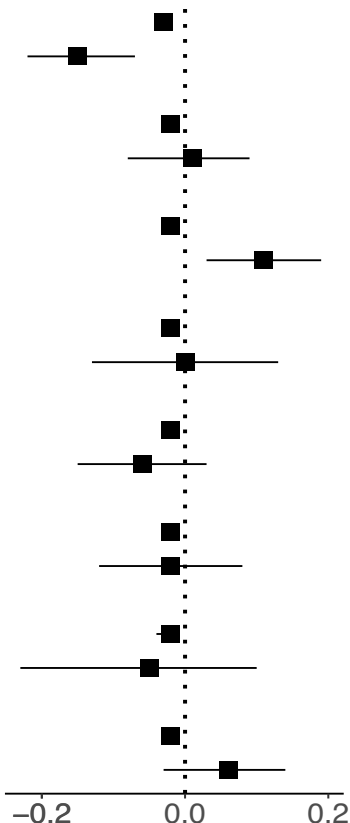

Supplement: s1 [file s1]
