# Supplementary material for: Changes in Heart Rate, Heart Rate Variability, Breathing Rate, and Skin Temperature throughout Pregnancy and the Impact of Emotions—A Longitudinal Evaluation Using a Sensor Bracelet
Source: Sensors (Basel). 2023 Jul 23;23(14):6620. doi: 10.3390/s23146620 (PMC10385491; doi:10.3390/s23146620)
Supplement: Supplementary file 1 [file sensors-23-06620-s001.zip]

Archive with 5 entries (5 files):
- Suppl. Figure S1a.pdf
- Suppl. Figure S1b.pdf
- Suppl. Figure S1c.pdf
- Suppl. Figure S1d.pdf
- Suppl. Table S1.pdf
